# Supplementary material
Source: PubMed Central journal article supplement (PMC3937986)
Supplement: NIHMS542384-supplement-Supplemental_Digital_Content.pdf [file NIHMS542384-supplement-Supplemental_Digital_Content.pdf]

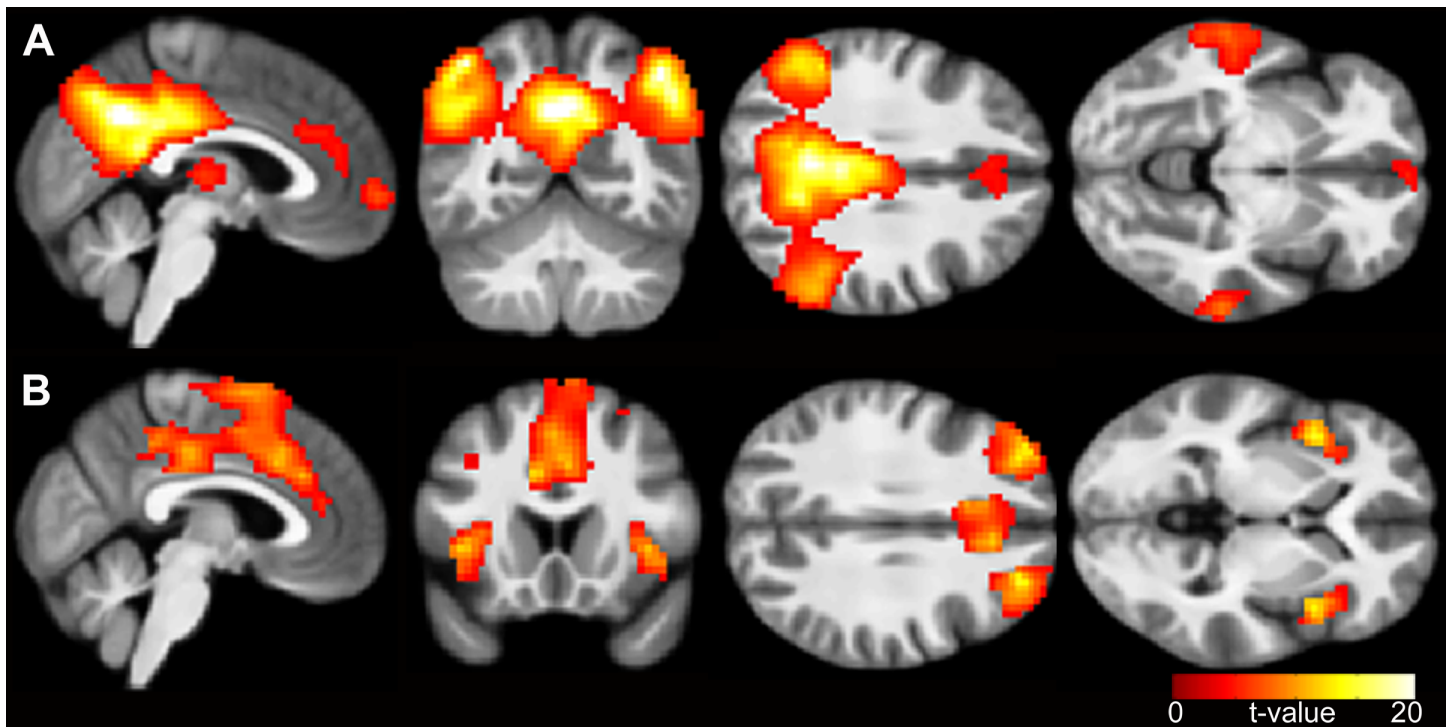

**Supplemental Digital Content 1.** (A) Default mode network and (B) salience network activity, across both sessions (baseline and post-exercise). Statistical maps thresholded at  $p < 0.001$  and overlaid onto a group-average anatomical image for visualization.
